# Supplementary material for: Ocean acidification does not affect magnesium composition or dolomite formation in living crustose coralline algae, Porolithon onkodes in an experimental system
Source: Copernicus journal article supplement (doi:10.5194/bg-12-5247-2015), 2015-09-14
Supplement: Supplementary file 1 [file bg-12-5247-2015-supplement.pdf]

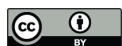

## *Supplement of*

# **Ocean acidification does not affect magnesium composition or dolomite formation in living crustose coralline algae, *Porolithon onkodes* in an experimental system**

**M. C. Nash et al.**

*Correspondence to:* M. C. Nash ([merinda.nash@anu.edu.au](mailto:merinda.nash@anu.edu.au))

The copyright of individual parts of the supplement might differ from the CC-BY 3.0 licence.

**Supplementary information for Nash et al.**

Ocean acidification does not affect magnesium composition or dolomite formation in living crustose coralline algae, *Porolithon onkodes* in an experimental system

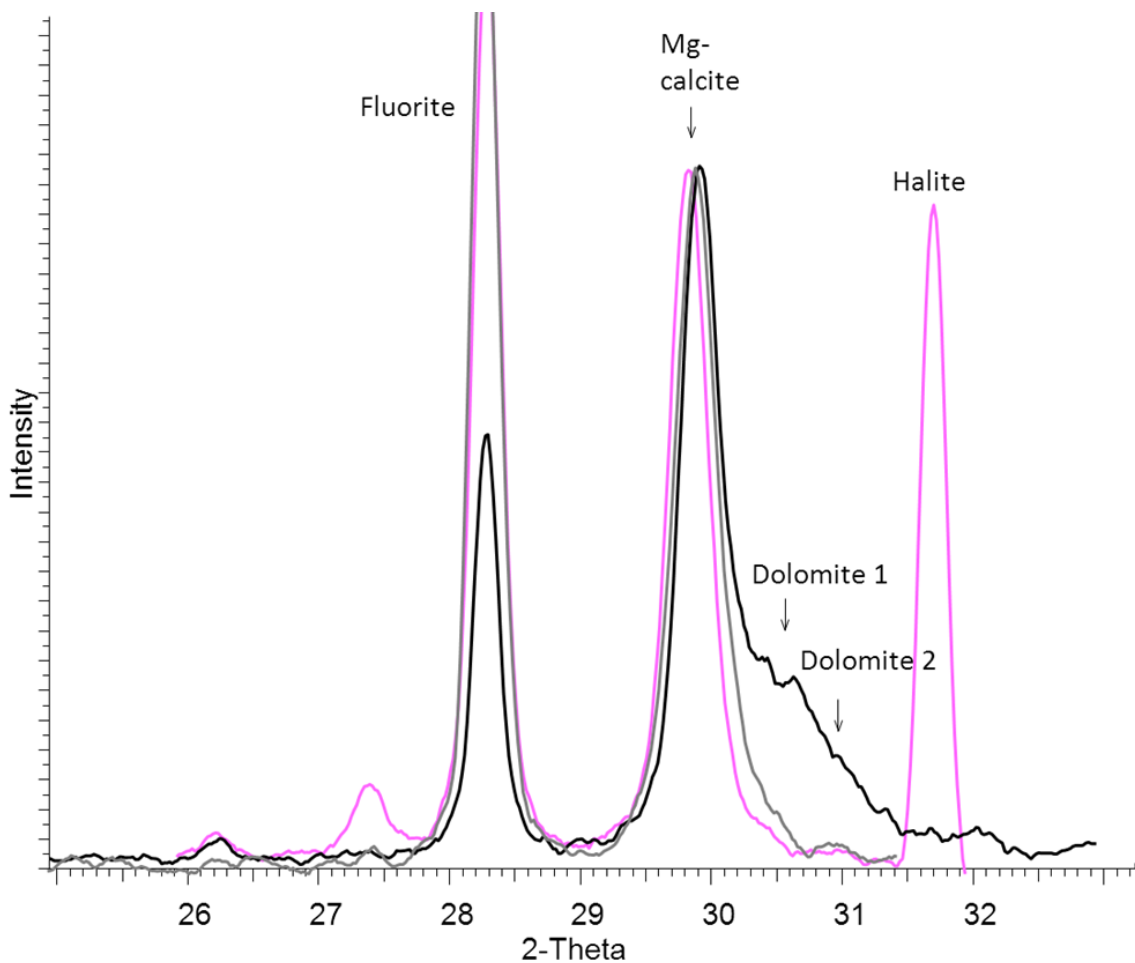

**Figure S1:** Example XRD scans. New settlement (pink line)(control tank 24, sample1, mol% 14.4, Asymm mol% 14.6, SI Table 3) has no peak asymmetry, the 3 month growth crust (grey line) (control 2, mol% 16.5, Asymm mol% 17.3, SI Table 1) has slight asymmetry and the bulk crust (black line) (control 2, mol% 17.6, Asymm mol% 26.7, SI Table 4) incorporating pre-experimental crust has asymmetry with an overlapping but clear peak for dolomite. Dolomite 1 is the peak position for ~50 mol%  $\text{MgCO}_3$  for disordered dolomite (as identified by Zhang et al. 2010, discussed in Nash et al. 2011 and expanded in Diaz-Pulido et al. 2014). Dolomite 2 is the peak position for stoichiometric fully ordered dolomite (ICSD file card PDF 00-036-0426).

Full data tables for XRD results

|           | <b>Mol %<br/>MgCO<sub>3</sub></b> | <b>Asymm<br/>mol%</b> |
|-----------|-----------------------------------|-----------------------|
| Pre-I 1   | 16.2%                             | 17.1%                 |
| Pre-I 2   | 16.6%                             | 17.0%                 |
| Pre-I 3   | 17.1%                             | 17.9%                 |
| Pre-I 5   | 16.3%                             | 17.5%                 |
| Pre-I 6   | 16.8%                             | 17.9%                 |
| Average   | <b>16.6%</b>                      | <b>17.5%</b>          |
| St. Dev   | <b>0.39%</b>                      | <b>0.42%</b>          |
|           |                                   |                       |
| Control 1 | 16.0%                             | 17.3%                 |
| Control 2 | 16.5%                             | 17.3%                 |
| Control 3 | 16.4%                             | 17.5%                 |
| Control 4 | 16.8%                             | 18.6%                 |
| Control 6 | 16.8%                             | *23.0%                |
| Average   | <b>16.5%</b>                      | <b>18.8%</b>          |
| St. Dev   | <b>0.31%</b>                      | <b>2.45%</b>          |
|           |                                   |                       |
| Med 1     | 17.3%                             | 18.0%                 |
| Med 2     | 16.5%                             | 17.3%                 |
| Med 3     | 16.2%                             | 16.8%                 |
| Med 4     | 16.2%                             | 17.3%                 |
| Med 5     | 15.9%                             | 16.7%                 |
| Average   | <b>16.4%</b>                      | <b>17.2%</b>          |
| St. Dev   | <b>0.53%</b>                      | <b>0.51%</b>          |
|           |                                   |                       |
| High 1    | 16.5%                             | 18.1%                 |
| High 2    | 17.5%                             | 18.9%                 |
| High 4    | 16.9%                             | 17.5%                 |
| High 5    | 16.2%                             | 17.1%                 |
| High 6    | 16.4%                             | 18.2%                 |
| Average   | <b>16.7%</b>                      | <b>17.9%</b>          |
| St. Dev   | <b>0.45%</b>                      | <b>0.68%</b>          |

**Table S1:** Magnesium composition for new *P. onkodes* crust grown during first 3 months in pre-industrial (Pre-I), control and high CO<sub>2</sub>. Asymm mol% incorporates the influence of any peak asymmetry toward dolomite. Net asymmetry is the difference between the

asymmetry mol% and the standard mol%  $\text{MgCO}_3$ . Net asymmetry  $> \sim 1$  suggests dolomite is present. There was no statistically significant difference between any of the treatments for either mol%.

\*This sample had halite and the XRD peak overlapped a low magnesite shoulder skewing the calculated mol% to higher values- sample excluded from average calculation for statistical analysis.

| <b>Treatment</b> | <b>Sample</b> | <b>Mol% <math>\text{MgCO}_3</math></b> | <b>Asymm mol%</b> |
|------------------|---------------|----------------------------------------|-------------------|
| Pre-I            | Tank 19       | 17.1%                                  | 18.8%             |
| Pre-I            | Tank 22       | 16.8%                                  | 20.6%             |
| Pre-I            | Tank 17       | 17.0%                                  | 19.1%             |
| Pre-I            | Tank 19, S2   | 16.1%                                  | 19.9%             |
| Pre-I            | Tank 19, S3   | 16.3%                                  | 17.6%             |
| Average          |               | <b>16.7%</b>                           | <b>19.2%</b>      |
| St. Dev.         |               | <b>0.42%</b>                           | <b>1.12%</b>      |
|                  |               |                                        |                   |
| Med              | Tank 18       | 16.3%                                  | 17.8%             |
| Med              | Tank 23       | 16.2%                                  | 17.5%             |
| Med              | Tank 15       | 16.5%                                  | 19.1%             |
| Average          |               | <b>16.4%</b>                           | <b>18.1%</b>      |
| St. Dev.         |               | <b>0.15%</b>                           | <b>0.84%</b>      |
|                  |               |                                        |                   |
| High             | Tank 21, S1   | 16.4%                                  | 18.9%             |
| High             | Tank 21, S2   | 15.7%                                  | 18.5%             |
| High             | Tank 21, S3   | 16.7%                                  | 18.6%             |
| High             | Tank 16, S1   | 16.2%                                  | 17.7%             |
| High             | Tank 16, S2   | 16.8%                                  | 18.8%             |
| High             | Tank 16, S3   | 17.0%                                  | 18.3%             |
| Average          |               | <b>16.5%</b>                           | <b>18.5%</b>      |
| St. Dev.         |               | <b>0.46%</b>                           | <b>0.44%</b>      |

**Table S2:** Mol%  $\text{MgCO}_3$  for new *P. onkodes* crust after 6 months. There is no difference between treatments.

| <b>Treatment</b> | <b>Sample no.</b> | <b>mol% MgCO<sub>3</sub></b> | <b>Asymm mol%</b> |
|------------------|-------------------|------------------------------|-------------------|
| Pre-I            | Tank 19, S1       | 15.8%                        | 16.0%             |
| Pre-I            | Tank 19, S2       | 14.3%                        | 14.9%             |
| Pre-I            | Tank 17, S1       | 14.4%                        | 14.5%             |
| Average          |                   | <b>14.8%</b>                 | <b>15.1%</b>      |
| St. Dev.         |                   | <b>0.83%</b>                 | <b>0.77%</b>      |
|                  |                   |                              |                   |
| Control          | Tank 20, S1       | 15.3%                        | 15.2%             |
| Control          | Tank 20, S2       | 14.7%                        | 14.8%             |
| Control          | Tank 24, S1       | 14.4%                        | 14.6%             |
| Control          | Tank 24, S2       | 14.5%                        | 14.5%             |
| Average          |                   | <b>14.7%</b>                 | <b>14.8%</b>      |
| St. Dev.         |                   | <b>0.4%</b>                  | <b>0.3%</b>       |
|                  |                   |                              |                   |
| Medium           | Tank 18, S1       | 14.2%                        | 14.2%             |
| Medium           | Tank 18, S2       | 14.7%                        | 14.7%             |
| Medium           | Tank 18, S3       | 15.2%                        | 15.5%             |
| Medium           | Tank 23, S1       | 15.0%                        | 15.0%             |
| Medium           | Tank 15, S1       | 14.4%                        | 14.6%             |
| Average          |                   | <b>14.7%</b>                 | <b>14.8%</b>      |
| St. Dev.         |                   | <b>0.41%</b>                 | <b>0.48%</b>      |
|                  |                   |                              |                   |
| High             | Tank 16, S1       | 15.1%                        | *14.7%            |
| High             | Tank 16, S2       | 15.0%                        | 16.0%             |
| High             | Tank 16, S3       | 14.9%                        | 14.8%             |
| High             | Tank 13, S1       | 15.6%                        | 15.8%             |
| High             | Tank 13, S2       | 13.8%                        | 13.8%             |
| Average          |                   | <b>14.9%</b>                 | <b>15.0%</b>      |
| St. Dev.         |                   | <b>0.7%</b>                  | <b>0.9%</b>       |

**Table S3:** Mol% MgCO<sub>3</sub> for new settlement -unidentified CCA- after 6 months. CCA had not reached reproductive stage and were not able to be identified. In order to have enough material for XRD, each XRD sample comprised multiple (2-4) small growth patches. The range of 0.2 mol% MgCO<sub>3</sub> for the averages, is within measurement precision. There is no significant difference between treatments for mol% MgCO<sub>3</sub>. There is little to no asymmetry influence on the mol% MgCO<sub>3</sub>, this in agreement with the observation that thick crusts had not formed.

\*The XRD pattern for this sample had a low calcite peak overlapping the Mg-calcite peak and accounts for the shift to lower mol% in the asymmetry measurement.

| <b>3 Month</b> | <b>Sample</b> | <b>mol%<br/>MgCO<sub>3</sub></b> | <b>Asymm mol%</b> | <b>Aragonite</b> |
|----------------|---------------|----------------------------------|-------------------|------------------|
| Pre-I          | Tank 2        | 17.4%                            | 20.6%             | 0                |
| Pre-I          | Tank 5        | 17.8%                            | 19.9%             | 1.3%             |
| Pre-I          | Tank 6        | 17.9%                            | 23.9%             | 1.3%             |
| Control        | Tank 3        | 17.9%                            | 20.4%             | 0                |
| Control        | Tank 4        | 17.2%                            | 23.1%             | 11.9%            |
| Control        | Tank 2        | 17.6%                            | 26.7%             | 0.8%             |
| Control        | Tank 1        | 17.5%                            | 19.3%             | 0.6%             |
| Control        | Tank 6        | 17.9%                            | 24.4%             | 3.0%             |
| Medium         | Tank 1        | 17.6%                            | 21.4%             | 10.2%            |
| Medium         | Tank 2        | 16.9%                            | 18.7%             | 1.3%             |
| Medium         | Tank 3        | 17.8%                            | 22.9%             | 0                |
| Medium         | Tank 4        | 16.9%                            | 20.2%             | 0                |
| Medium         | Tank 5        | 17.5%                            | 18.7%             | 1.5%             |
| High           | Tank 2        | 17.3%                            | 21.7%             | 0                |
| High           | Tank 5        | 17.3%                            | 20.7%             | 0                |
| High           | Tank 4        | 17.1%                            | 18.5%             | 1.7%             |
| Average        |               | <b>17.5%</b>                     | <b>21.3%</b>      |                  |
| St. Dev        |               | <b>0.33%</b>                     | <b>2.34%</b>      |                  |
|                |               |                                  |                   |                  |
| <b>6 Month</b> | <b>Sample</b> | <b>Mol%<br/>MgCO<sub>3</sub></b> | <b>Asymm mol%</b> | <b>Aragonite</b> |
| Pre-I          | Tank 19       | 18.2%                            | 25.1%             | 0                |
| Pre-I          | Tank 22       | 17.6%                            | 23.2%             | 0                |
| Pre-I          | Tank 17       | 18.1%                            | 18.9%             | 4.10%            |
| Pre-I          | Tank 19, S2   | 17.9%                            | 23.7%             | 0                |
| Pre-I          | Tank 19, S3   | 16.4%                            | 18.9%             | 9.50%            |
| Med            | Tank 18       | 17.4%                            | 20.6%             | 0.90%            |
| Med            | Tank 23       | 16.9%                            | 19.1%             | 9.40%            |
| Med            | Tank 15       | 17.6%                            | 23.7%             | 0                |
| High           | Tank 16, S1   | 17.9%                            | 20.1%             | 0                |
| High           | Tank 16, S2   | 17.6%                            | 25.7%             | 0                |
| High           | Tank 16, S3   | 17.6%                            | 22.8%             | 0                |
| High           | Tank 21, S1   | 17.1%                            | 21.5%             | 1.80%            |
| High           | Tank 21, S2   | 17.9%                            | 24.1%             | 0                |
| High           | Tank 21, S3   | 18.2%                            | 20.5%             | 1.20%            |
| Average        |               | <b>17.6%</b>                     | <b>22.0%</b>      |                  |
| St. Dev        |               | <b>0.51%</b>                     | <b>2.34%</b>      |                  |

**Table S4:** Mineralogy for pre-experimental *P. onkodes* crust after 3 and 6 months experimental duration. There is no difference in mol% MgCO<sub>3</sub> or Asymmetry mol% for 3 and 6 months. The range of mol% MgCO<sub>3</sub> is from 16.4 to 18.2 mol% MgCO<sub>3</sub>, whereas the Asymm. mol% which incorporates the dolomite influence, has a greater range, from 18.5 to 26.7 mol% MgCO<sub>3</sub>. This indicates that samples range from having no or minimal dolomite up to being considered as dolomite-rich (as per Nash et al. 2013). Aragonite ranges from zero up to nearly 12%.

| Treatment | Spectrum     | mol%<br>MgCO <sub>3</sub> | Treatment | Spectrum     | mol%<br>MgCO <sub>3</sub> | Treatment | Spectrum    | mol%<br>MgCO <sub>3</sub> |
|-----------|--------------|---------------------------|-----------|--------------|---------------------------|-----------|-------------|---------------------------|
| Control   | Spectrum 14  | 59.8%                     | Control   | Spectrum 23  | 28.3%                     | High      | Spectrum 93 | 17.9%                     |
| High      | Spectrum 39  | 58.6%                     | Control   | Spectrum 56  | 28.3%                     | Pre       | Spectrum 42 | 17.9%                     |
| High      | Spectrum 19  | 56.5%                     | Pre       | Spectrum 57  | 28.1%                     | High      | Spectrum 4  | 17.5%                     |
| High      | Spectrum 16  | 55.9%                     | Pre       | Spectrum 51  | 28.0%                     | Control   | Spectrum 32 | 17.1%                     |
| Control   | Spectrum 66  | 53.1%                     | Pre       | Spectrum 60  | 27.6%                     | High      | Spectrum 5  | 16.5%                     |
| High      | Spectrum 37  | 51.4%                     | High      | Spectrum 104 | 27.5%                     | Control   | Spectrum 13 | 16.4%                     |
| Control   | Spectrum 18  | 46.0%                     | High      | Spectrum 18  | 27.0%                     | High      | Spectrum 8  | 16.0%                     |
| Pre       | Spectrum 72  | 45.7%                     | Pre       | Spectrum 53  | 26.5%                     | High      | Spectrum 34 | 15.6%                     |
| Pre       | Spectrum 71  | 45.4%                     | Pre       | Spectrum 55  | 26.0%                     | Control   | Spectrum 41 | 15.4%                     |
| Pre       | Spectrum 70  | 44.8%                     | Pre       | Spectrum 61  | 25.9%                     | High      | Spectrum 12 | 15.0%                     |
| Control   | Spectrum 50  | 44.7%                     | Pre       | Spectrum 45  | 24.9%                     | Pre       | Spectrum 67 | 14.8%                     |
| Control   | Spectrum 68  | 44.7%                     | Pre       | Spectrum 54  | 24.6%                     | High      | Spectrum 22 | 14.4%                     |
| Control   | Spectrum 11  | 44.4%                     | Control   | Spectrum 9   | 24.5%                     | High      | Spectrum 89 | 14.3%                     |
| Control   | Spectrum 30  | 43.7%                     | Control   | Spectrum 33  | 24.5%                     | High      | Spectrum 99 | 14.3%                     |
| Control   | Spectrum 37  | 43.1%                     | Control   | Spectrum 45  | 24.4%                     | Pre       | Spectrum 81 | 14.1%                     |
| Control   | Spectrum 47  | 41.9%                     | Pre       | Spectrum 73  | 23.2%                     | Control   | Spectrum 53 | 14.0%                     |
| High      | Spectrum 38  | 41.5%                     | High      | Spectrum 84  | 23.1%                     | High      | Spectrum 3  | 13.6%                     |
| Control   | Spectrum 29  | 41.2%                     | Pre       | Spectrum 66  | 23.1%                     | Control   | Spectrum 61 | 13.5%                     |
| Pre       | Spectrum 59  | 40.8%                     | High      | Spectrum 90  | 23.0%                     | High      | Spectrum 7  | 13.5%                     |
| High      | Spectrum 103 | 40.6%                     | High      | Spectrum 91  | 22.5%                     | High      | Spectrum 32 | 13.3%                     |
| Control   | Spectrum 46  | 40.6%                     | High      | Spectrum 98  | 22.3%                     | Pre       | Spectrum 69 | 13.2%                     |
| Pre       | Spectrum 41  | 40.0%                     | High      | Spectrum 30  | 22.2%                     | High      | Spectrum 25 | 12.5%                     |
| Control   | Spectrum 21  | 39.2%                     | Pre       | Spectrum 47  | 22.2%                     | High      | Spectrum 31 | 12.0%                     |
| Control   | Spectrum 22  | 37.6%                     | High      | Spectrum 92  | 22.1%                     | Pre       | Spectrum 76 | 11.9%                     |
| High      | Spectrum 13  | 37.6%                     | Pre       | Spectrum 68  | 22.0%                     | High      | Spectrum 9  | 11.8%                     |
| Control   | Spectrum 55  | 37.4%                     | Control   | Spectrum 12  | 21.7%                     | High      | Spectrum 28 | 11.6%                     |
| High      | Spectrum 108 | 37.3%                     | Pre       | Spectrum 65  | 21.5%                     | Control   | Spectrum 39 | 11.0%                     |
| Pre       | Spectrum 43  | 37.2%                     | Pre       | Spectrum 64  | 21.3%                     | High      | Spectrum 35 | 11.0%                     |

| Treatment | Spectrum     | mol%<br>MgCO <sub>3</sub> | Treatment | Spectrum     | mol%<br>MgCO <sub>3</sub> | Treatment | Spectrum     | mol%<br>MgCO <sub>3</sub> |
|-----------|--------------|---------------------------|-----------|--------------|---------------------------|-----------|--------------|---------------------------|
| Pre       | Spectrum 58  | 36.3%                     | High      | Spectrum 106 | 21.2%                     | Pre       | Spectrum 74  | 10.5%                     |
| Pre       | Spectrum 44  | 36.2%                     | Control   | Spectrum 48  | 21.1%                     | Control   | Spectrum 49  | 10.5%                     |
| Control   | Spectrum 31  | 35.9%                     | High      | Spectrum 23  | 21.1%                     | High      | Spectrum 105 | 10.2%                     |
| Pre       | Spectrum 46  | 35.8%                     | High      | Spectrum 87  | 20.9%                     | Control   | Spectrum 35  | 9.8%                      |
| High      | Spectrum 15  | 34.7%                     | Pre       | Spectrum 78  | 20.4%                     | Control   | Spectrum 63  | 9.8%                      |
| High      | Spectrum 107 | 34.6%                     | High      | Spectrum 88  | 20.4%                     | Control   | Spectrum 38  | 9.4%                      |
| High      | Spectrum 17  | 34.1%                     | High      | Spectrum 96  | 20.3%                     | Control   | Spectrum 44  | 9.3%                      |
| High      | Spectrum 109 | 34.0%                     | Pre       | Spectrum 62  | 20.3%                     | Control   | Spectrum 60  | 8.1%                      |
| Pre       | Spectrum 52  | 33.3%                     | High      | Spectrum 36  | 20.2%                     | Pre       | Spectrum 79  | 7.9%                      |
| Pre       | Spectrum 48  | 32.0%                     | High      | Spectrum 27  | 19.8%                     | Control   | Spectrum 27  | 7.8%                      |
| Pre       | Spectrum 50  | 31.8%                     | High      | Spectrum 97  | 19.8%                     | High      | Spectrum 33  | 7.5%                      |
| Control   | Spectrum 15  | 31.5%                     | High      | Spectrum 85  | 19.3%                     | High      | Spectrum 10  | 7.2%                      |
| Control   | Spectrum 25  | 31.1%                     | High      | Spectrum 26  | 19.2%                     | Pre       | Spectrum 63  | 7.0%                      |
| Control   | Spectrum 20  | 30.9%                     | High      | Spectrum 102 | 19.2%                     | Control   | Spectrum 34  | 6.9%                      |
| Control   | Spectrum 19  | 30.2%                     | Control   | Spectrum 40  | 19.0%                     | Control   | Spectrum 52  | 6.9%                      |
| Control   | Spectrum 43  | 30.2%                     | Pre       | Spectrum 56  | 18.9%                     | Control   | Spectrum 58  | 6.9%                      |
| Control   | Spectrum 16  | 29.5%                     | High      | Spectrum 29  | 18.7%                     | Control   | Spectrum 59  | 6.9%                      |
| Control   | Spectrum 10  | 29.3%                     | High      | Spectrum 6   | 18.6%                     | Control   | Spectrum 57  | 6.7%                      |
| Control   | Spectrum 42  | 29.2%                     | High      | Spectrum 94  | 18.5%                     | Control   | Spectrum 67  | 6.3%                      |
| Control   | Spectrum 17  | 29.1%                     | Pre       | Spectrum 77  | 18.4%                     | Control   | Spectrum 26  | 6.2%                      |
| High      | Spectrum 14  | 29.0%                     | Pre       | Spectrum 75  | 18.2%                     | Control   | Spectrum 36  | 6.1%                      |
| High      | Spectrum 20  | 28.8%                     | High      | Spectrum 86  | 18.0%                     |           |              |                           |

**Table S5:** SEM-EDS spectrum results for mol% MgCO<sub>3</sub>. Dolomite range 36.3 – 59.8 mol% MgCO<sub>3</sub>. Mg-calcite range 10.5 – 28.3 mol% MgCO<sub>3</sub>.

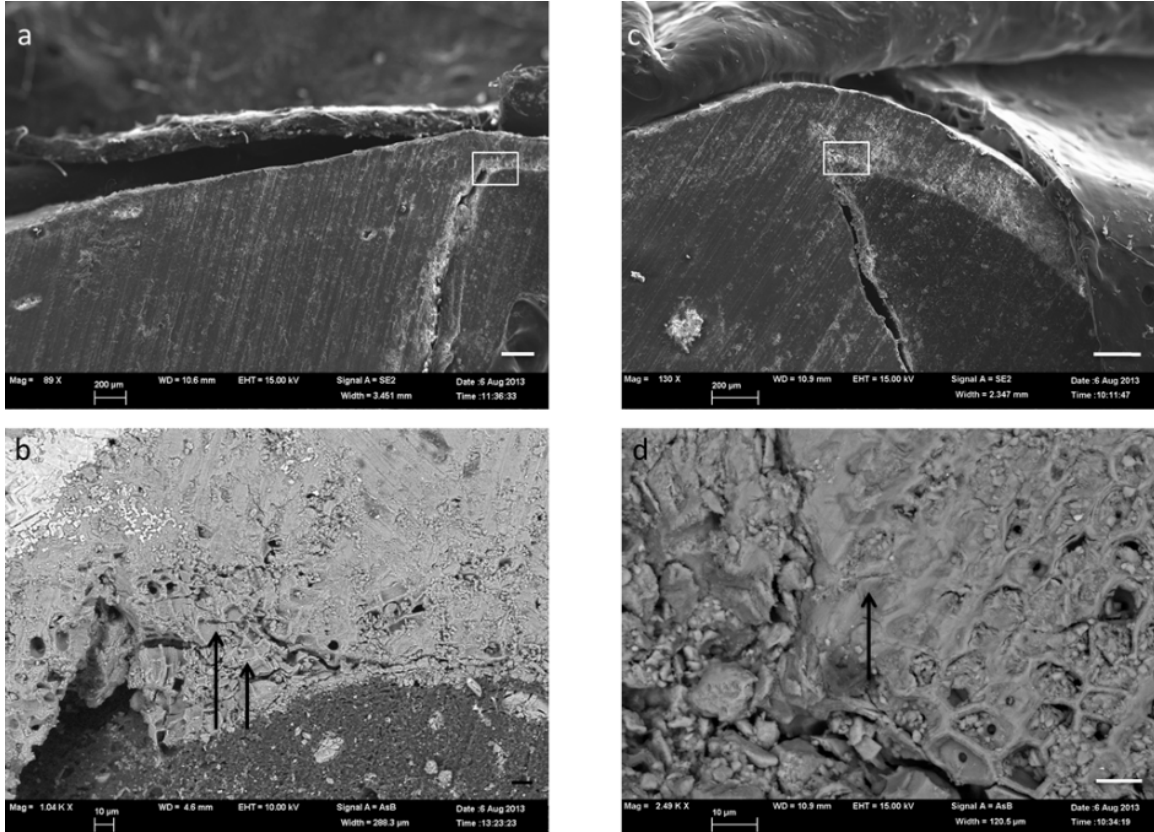

**Figure S2.** SEM of Pre-industrial (**a**, **b**) and High CO<sub>2</sub> (**c**, **d**) new *P. onkodes* crust with dolomite. (**a**) Overview of experimental growth on resin (right hand side) Pre-industrial CCA. Box is enlarged in B. (**b**) Experimental growth with dolomite (measured by EDS as 37.6 and 55.9 mol% MgCO<sub>3</sub>) (arrows). Similarly to the control samples, experimental cells are not generally in-filled with dolomite to the extent observed in the old growth. (**c**) Overview of experimental growth on resin for High CO<sub>2</sub> CCA. Box enlarged in D. (**d**) Experimental growth with dolomite (EDS 40.0 mol% MgCO<sub>3</sub>) (arrows). Similarly to control and Pre-industrial, the new cells are generally not in-filled with dolomite to the extent observed in the old growth. Scale bars: A and C = 200 microns, B and D = 10 microns.

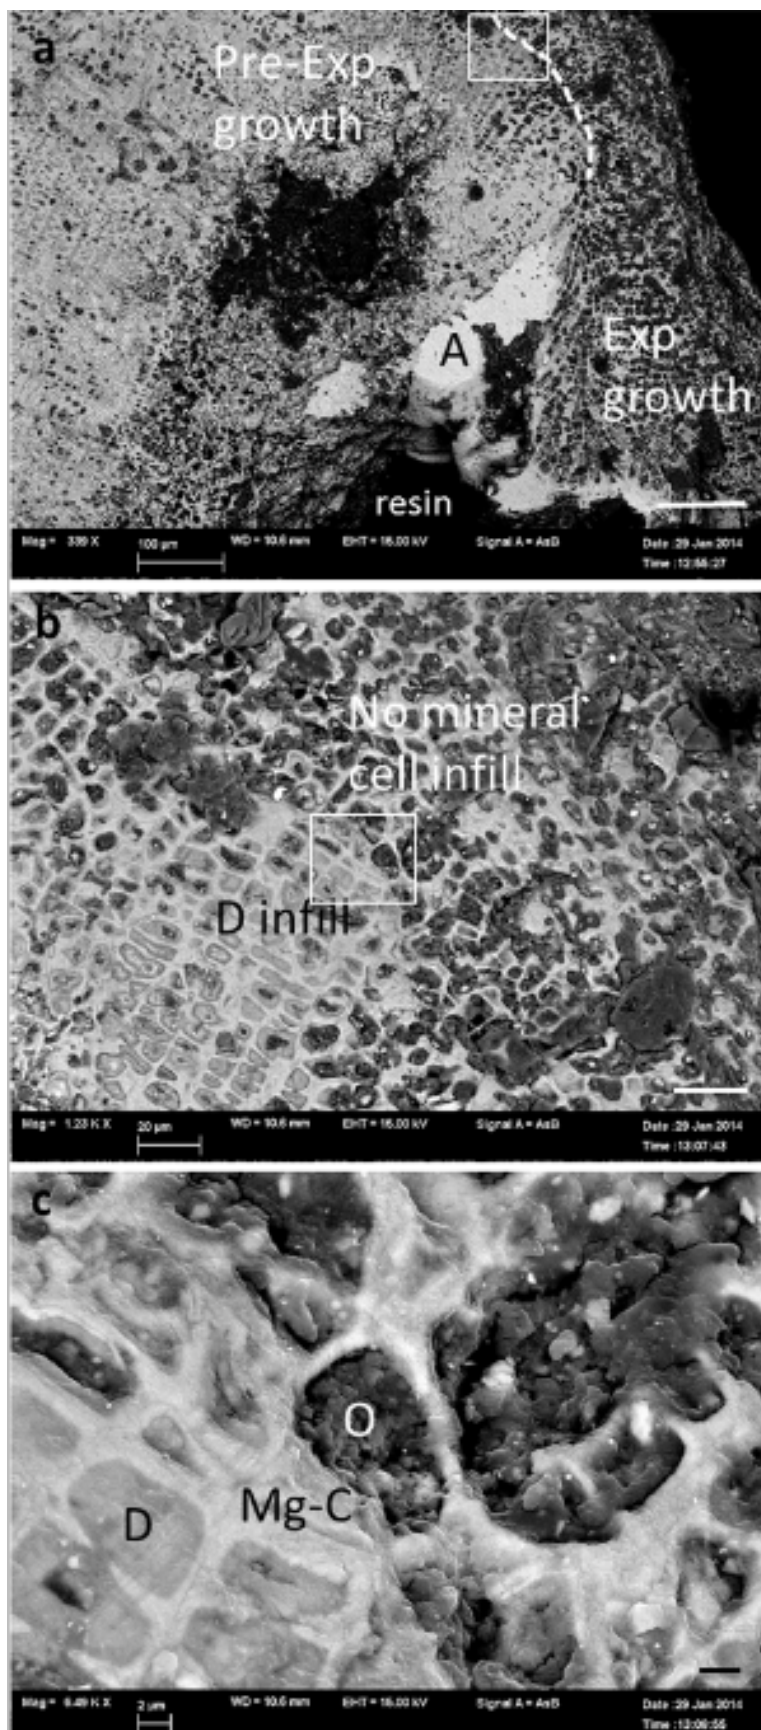

**Figure S3:** Control *P. onkodes* experimental growth over resin. **(a)** The experimental growth over the resin can be traced back to determine the boundary for the pre-experimental growth and the experimental growth. Beneath the experimental growth on resin, part of the crust has altered to aragonite (A). White box enlarged in B. **(b)** Transition from pre-experimental growth with dolomite infill (D infill) to experimental growth with organic infill but no mineral infill. **(c)** close up of transition showing dolomite in-fill cells **(d)** and cells in experimental growth with organic material (O), Mg-C – Mg-calcite, D - dolomite. Scale bars A = 100 microns, B = 20 microns, C = 2 microns.

### Supplementary reference

Zhang, F., Xu, H., Hironi, K., and Roden E, E.: A relationship between d104 value and composition in the calcite-disordered dolomite solid-solution series, *Am. Mineral*, 95, 1650, 2010.
